# Supplementary material for: Large-scale preparation and multi-dimensional characterization of high-purity mycotoxin deoxynivalenol in rice culture inoculated with Fusarium graminearum
Source: Royal Society of Chemistry journal article supplement (doi:10.1039/c4ay00580e), 2014-05-09
Supplement: c4ay00580e1.pdf [file c4ay00580e1.pdf]

**Supporting information for:**

**Large-scale preparation and multi-dimensional characterization of high-purity  
mycotoxin deoxynivalenol in rice culture inoculated with *Fusarium  
graminearum***

Zhiyong Zhao <sup>a,b,†</sup>, Suquan Song <sup>a,†</sup>, Na Liu <sup>a</sup>, Qinxiong Rao<sup>a</sup>, Jiafa Hou <sup>b</sup>, Sarah De  
Saeger <sup>c</sup>, Aibo Wu <sup>a,\*</sup>

<sup>a</sup> Laboratory of Quality & Safety Risk Assessment for Agro-products (Shanghai),  
Ministry of Agriculture, Institute for Agri-food Standards and Testing Technology,  
Shanghai Academy of Agricultural Sciences, 1000 Jinqi Road, Shanghai 201403, P.  
R. China

<sup>b</sup> College of Veterinary Medicine, Nanjing Agricultural University, No.1 Weigang  
Street, Nanjing, Jiangsu 210095, P. R. China

<sup>c</sup> Laboratory of Food Analysis, Faculty of Pharmaceutical Sciences, Ghent University,  
Harelbekestraat 72, 9000 Gent, Belgium

<sup>†</sup> Zhiyong Zhao and Suquan Song contributed equally to this work.

<sup>\*</sup> To whom correspondence may be addressed.

Phone: +86-21-62202875; Fax: +86-21-62203612

Email: wuaibo@saas.sh.cn

32 **Figure captions**

33

34 **Fig. S-1**

35 Preparative chromatograms of DON crude extract in the first run, the tenth and  
36 twentieth run in first day (a) and in the fifth day (b).

37 **Fig. S-2**

38 UV spectrum of purified DON and further-processing DON by different decolorizing  
39 agents ranged from 190 nm to 800 nm. Insert: the solution of purified DON before  
40 and after absorption by montmorillonite.

41 **Fig. S-3**

42 The chromatograms of peak purity of commercial DON standard (a) and obtained  
43 DON (b).

44

45 **Table S-1**

46 Previous reports on the production of deoxynivalenol

47

48

49

50

51

52

53

54

55

56

57

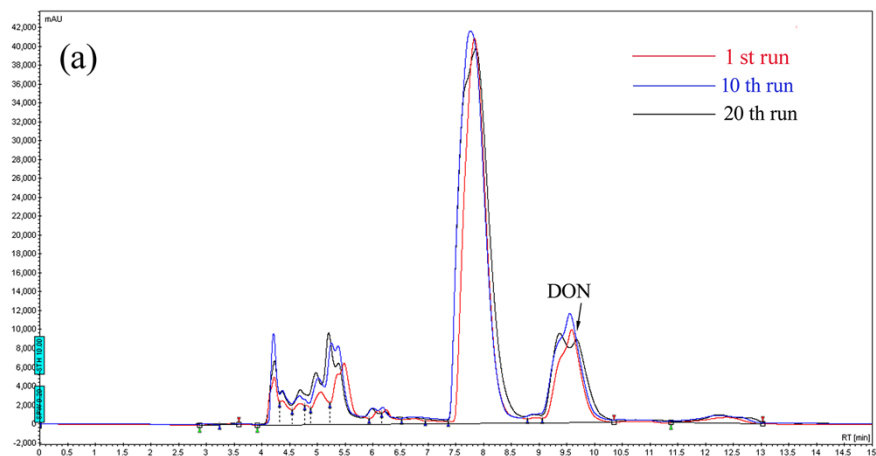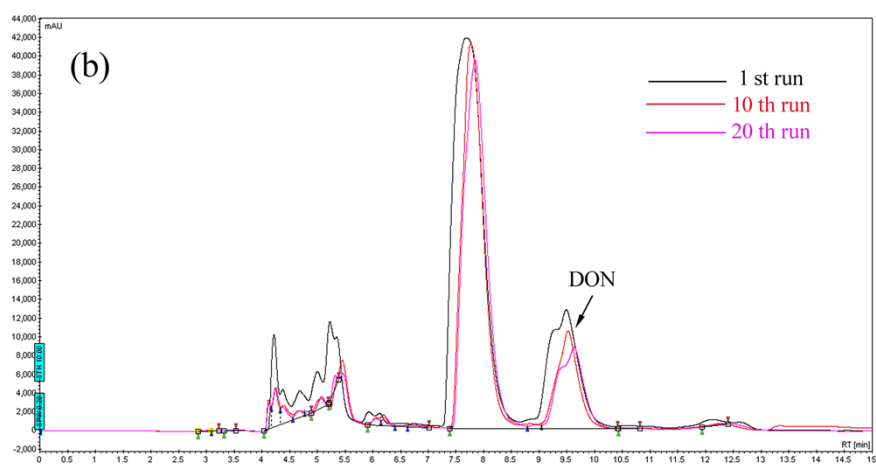

**Fig. S-1**

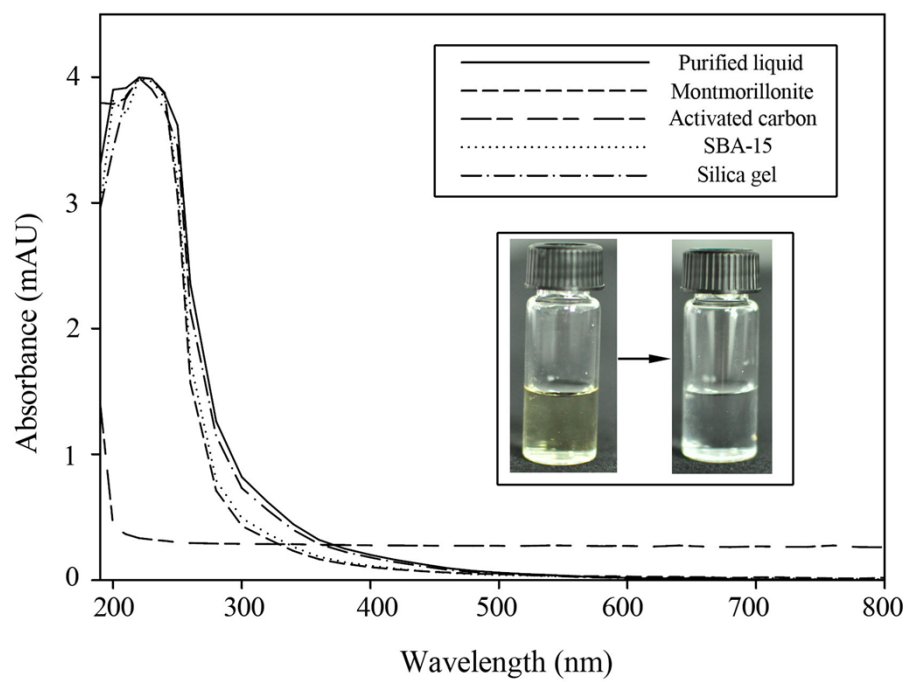

**Fig. S-2**

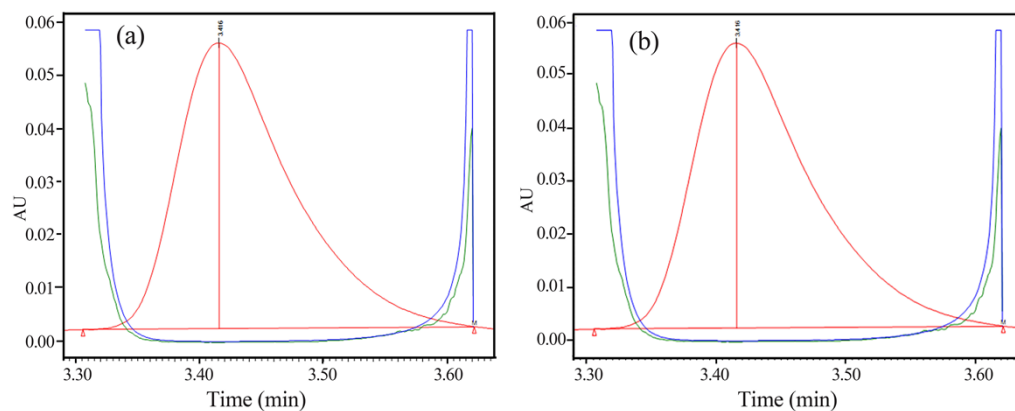

**Fig. S-3**

100 **Table S-1** Previous reports on the production of deoxynivalenol

101

| References                       | Culture medium and the content of DON/Ac-DON              | Sample pretreatments                                                                | Purified methods                                                                | Identification methods | The purity of DON |
|----------------------------------|-----------------------------------------------------------|-------------------------------------------------------------------------------------|---------------------------------------------------------------------------------|------------------------|-------------------|
| Bennett et al. (1981) [13]       | Corn (20 µg DON/g)                                        | 80% methanol/water*; partitioned with ethyl acetate; defatted with petroleum ether; | Silica gel column and HPLC (C <sub>18</sub> column)                             | GLC, MS and GLC-MS     | NA                |
| Vesonder et al. (1982) [14]      | Corn (362 µg DON/g)                                       | 40% methanol/water*; partitioned with ethyl acetate; dried over sodium sulfate      | Silica gel column, silanised silica gel column and pre-HPLC;                    | RPLC and GLC           | 95%~96%           |
| Ehrlich and Lillehoj (1984) [11] | Rice (450 µg DON/g)                                       | 86% acetonitrile/water*;                                                            | Silica gel 60, charcoal-alumina column and Sephadex LH20 column                 | HPLC                   | >90%              |
| Witt et al. (1985) [15]          | Liquid medium (Ac-DON)                                    | methylene chloride*                                                                 | Activated florisil column and Rexyn 201 (OH <sup>-</sup> ) ion-exchange column; | NA                     | NA                |
| Greenhalgh et al. (1986) [12]    | Rice (2840 µg Ac-DON/g)                                   | 10% methanol/water*; partitioned with ethyl acetate;                                | Florisil column and Rexyn 201 (OH <sup>-</sup> ) ion-exchange column;           | GC-ECD and GC-MS       | 95%               |
| Altpeter and Posselt (1994) [10] | Rice (600~700 µg DON/g)                                   | 60% methanol/water*; partitioned with ethyl acetate;                                | LPLC on silica gel column                                                       | TLC and HPLC           | NA                |
| Clifford et al.(2003) [16]       | Rice (357µg DON/g)                                        | 70% methanol/water*; partitioned with ethyl acetate;                                | LPLC on silica gel column;                                                      | HPLC, MS and NMR       | >99%              |
| He et al. (2007) [9]             | Rice (1160 µg DON/g)<br>field mouldy corn (1300 µg DON/g) | Methanol*;                                                                          | HSCCC                                                                           | HPLC-UV and HPLC-MS/MS | >94.9%            |

102 NA, not available; \*, extraction solution;

103 LPLC, low-pressure liquid chromatography; HSCCC, high-speed counter-current chromatography.

104 RPLC, radial pressure liquid chromatography; GLC, gas-liquid chromatography;

105 Pre-HPLC, preparative high performance liquid chromatography;

106 NMR, nuclear magnetic resonance spectroscopy; GC-ECD, gas chromatography-electrical conductivity detector;

107
